# Supplementary material for: Differential regulation of extracellular matrix proteins in three recurrent liver metastases of a single patient with colorectal cancer
Source: Springer Nature journal article supplement (doi:10.1007/s10585-020-10058-8), 2020-10-24
Supplement: MOESM1 [file 18517712]

# Suppl. Figure 1

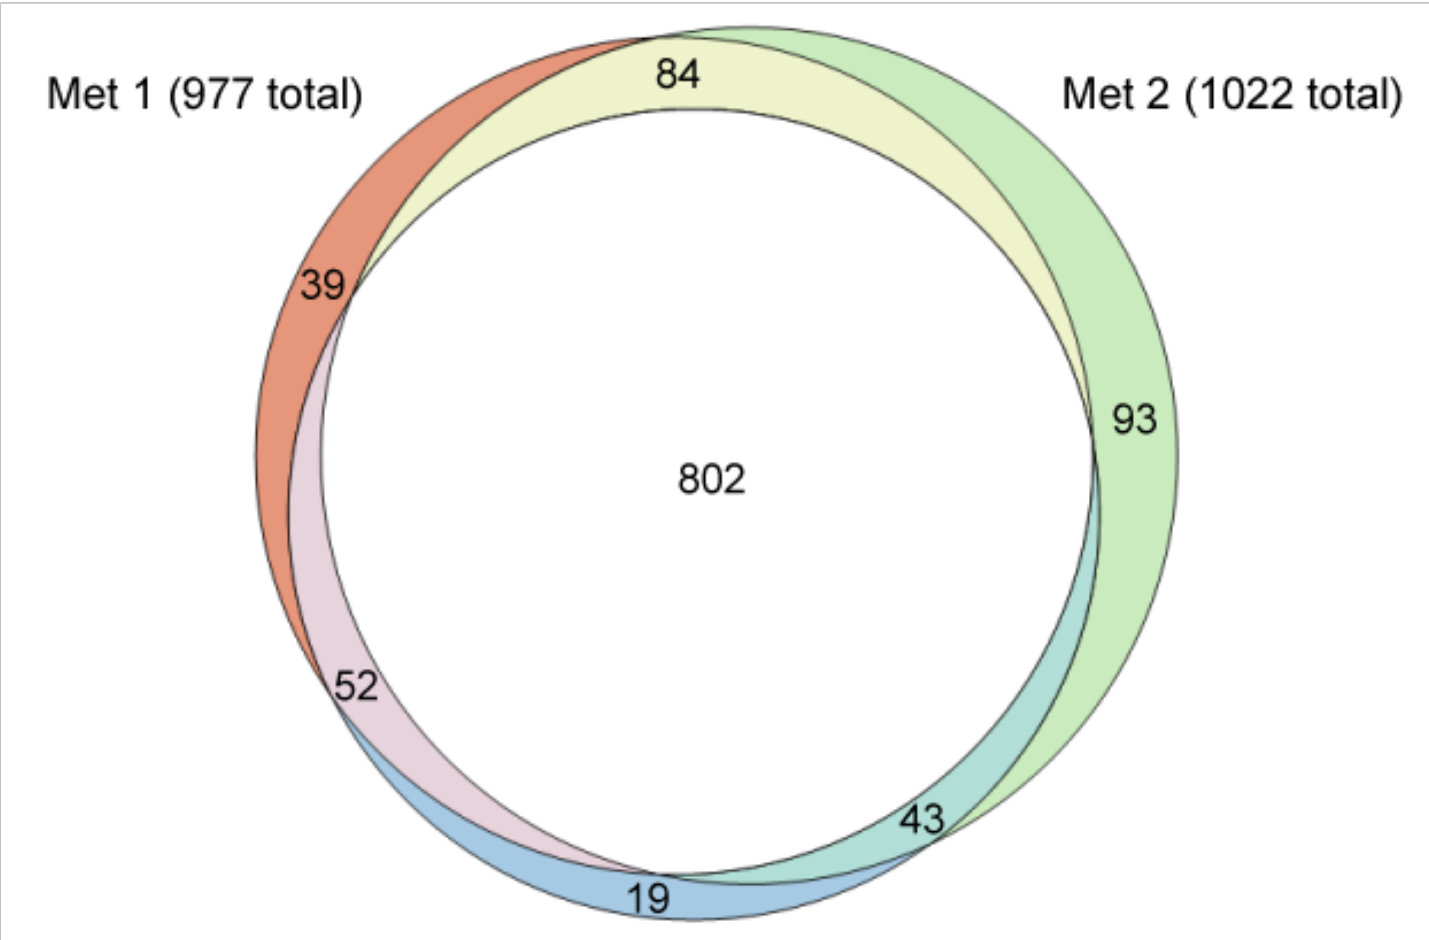

Met 3 (916 total)
